# Supplementary material for: Physiologically Based Pharmacokinetic (PBPK) Modeling to Predict CYP3A-Mediated Drug Interaction between Saxagliptin and Nicardipine: Bridging Rat-to-Human Extrapolation
Source: MDPI journal article supplement (doi:10.3390/pharmaceutics16020280), 2024-02-16
Supplement: s1 [file s1]

# Supplementary Material S1

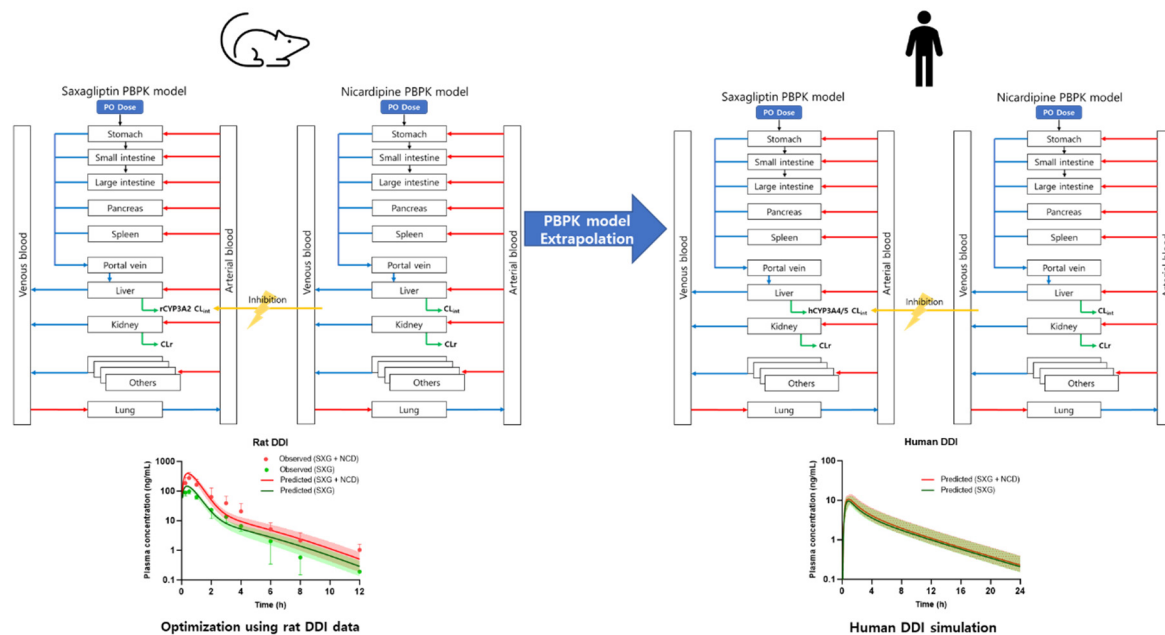

**Figure S1.** Overall PBPK modeling scheme

**Table S1.** Organs and physiological parameters in PBPK models

| Species          | Rat        |                          | Human      |                          |
|------------------|------------|--------------------------|------------|--------------------------|
| Body weight (kg) | 0.23       |                          | 73         |                          |
| Organ            | Volume (L) | Blood flow rate (mL/min) | Volume (L) | Blood flow rate (mL/min) |
| Venous blood     | 0.00676    |                          | 0.96       |                          |
| Arterial blood   | 0.00294    |                          | 0.42       |                          |
| Bone             | 0.02       | 2.53                     | 11.82      | 320                      |
| Brain            | 0.0017     | 1.33                     | 1.51       | 780                      |
| Fat              | 0.01       | 0.4                      | 14.65      | 320                      |
| Gonads           | 0.0025     | 0.48                     | 0.04       | 3.25                     |
| Heart            | 0.0008     | 3.92                     | 0.42       | 260                      |
| Kidney           | 0.0023     | 9.23                     | 0.44       | 1330                     |
| Large intestine  | 0.00218    | 5.0                      | 0.41       | 260                      |
| Liver            | 0.01       | 2.0                      | 2.38       | 430                      |
| Lung             | 0.001      | 40                       | 1.21       | 6090                     |
| Muscle           | 0.12       | 7.5                      | 32.64      | 1120                     |
| Pancreas         | 0.0013     | 0.517                    | 0.19       | 70                       |
| Portal vein      | 0.0015     | 9.78                     | 1.04       | 1210                     |
| Skin             | 0.04       | 5.83                     | 3.76       | 330                      |
| Small intestine  | 0.005      | 2.5                      | 0.72       | 650                      |
| Spleen           | 0.0006     | 0.633                    | 0.21       | 170                      |
| Stomach          | 0.0011     | 1.13                     | 0.17       | 70                       |

**Table S2.** Partition coefficients (intracellular:plasma) of saxagliptin and nicardipine in PBPK models.

| <b>Species</b>  |  | <b>Rat</b>  |             | <b>Human</b> |             |
|-----------------|--|-------------|-------------|--------------|-------------|
| <b>Organ</b>    |  | Saxagliptin | Nicardipine | Saxagliptin  | Nicardipine |
| Bone            |  | 0.52        | 1740        | 0.63         | 109         |
| Brain           |  | 0.71        | 712         | 0.87         | 44.5        |
| Fat             |  | 0.42        | 5100        | 0.51         | 319         |
| Gonads          |  | 0.68        | 214         | 0.83         | 13.4        |
| Heart           |  | 0.66        | 661         | 0.80         | 41.3        |
| Kidney          |  | 0.68        | 335         | 0.83         | 22.2        |
| Large intestine |  | 0.69        | 414         | 0.84         | 25.9        |
| Liver           |  | 0.66        | 466         | 0.81         | 29.1        |
| Lung            |  | 0.69        | 89.6        | 0.84         | 5.60        |
| Muscle          |  | 0.69        | 108         | 0.85         | 6.74        |
| Pancreas        |  | 0.63        | 528         | 0.77         | 33.0        |
| Skin            |  | 0.58        | 678         | 0.71         | 42.4        |
| Small intestine |  | 0.69        | 414         | 0.84         | 25.9        |
| Spleen          |  | 0.67        | 129         | 0.82         | 8.08        |
| Stomach         |  | 0.69        | 414         | 0.84         | 25.9        |
